# Supplementary material for: Both increasing the Iso-to-Col transition and lowering the solidifying temperatures of a triazine-based dendrimer by introducing CN polar groups in the dendritic core
Source: Royal Society of Chemistry journal article supplement (doi:10.1039/c9tc04004h), 2019-01-01
Supplement: c9tc04004h1.pdf [file c9tc04004h1.pdf]

## Supporting Information

### Both Raising the Iso-to-Col Transition and Lowering the Solidifying Temperatures of the Triazine-based Dendrimer by Introducing CN Polar Groups in the Dendritic Core

*Cheng-Hua Lee,<sup>†</sup> Chun-Chi Huang,<sup>‡</sup> Chia-Ying Li,<sup>†</sup> Long-Li Lai,<sup>\*,†</sup> Jey-Jau Lee,<sup>§</sup> and Hsiu-Fu Hsu<sup>\*,‡</sup>*

<sup>†</sup>Department of Applied Chemistry, National Chi Nan University, Puli, Nantou 545, Taiwan

<sup>‡</sup>National Synchrotron Radiation Research Center, Hsinchu 300, Taiwan

<sup>§</sup>Department of Chemistry, Tamkang University, New Taipei City 251, Taiwan

#### Table of contents

|                                                                                                                                                                                                                                                                                                                             |    |
|-----------------------------------------------------------------------------------------------------------------------------------------------------------------------------------------------------------------------------------------------------------------------------------------------------------------------------|----|
| Figure S1. The (a) <sup>1</sup> H- NMR and (b) <sup>13</sup> C-NMR spectrum of <b>1a</b> .....                                                                                                                                                                                                                              | 2  |
| Figure S2. The (a) <sup>1</sup> H- NMR and (b) <sup>13</sup> C-NMR spectrum of <b>1b</b> .....                                                                                                                                                                                                                              | 3  |
| Figure S3. The MALDI-TOF mass spectrum of (a) <b>1a</b> and (b) <b>1b</b> .....                                                                                                                                                                                                                                             | 4  |
| Figure S4. DSC data of compounds (a) <b>1a</b> and (b) <b>1b</b> .....                                                                                                                                                                                                                                                      | 5  |
| Table S1. Calculated XRD data of compounds <b>1a</b> , <b>1b</b> and <b>1c</b> .....                                                                                                                                                                                                                                        | 6  |
| Synthesis of compound <b>2</b> .....                                                                                                                                                                                                                                                                                        | 7  |
| Figure S6. The (a) <sup>1</sup> H- NMR and (b) <sup>13</sup> C-NMR spectrum of <b>2</b> .....                                                                                                                                                                                                                               | 8  |
| Figure S7. The HR mass spectrum of <b>2</b> .....                                                                                                                                                                                                                                                                           | 9  |
| Figure S8. The powder-XRD patterns of <b>1c</b> upon cooling at 114 (top), 110 (middle), and 105 °C (bottom). For comparison, the d-spacings of <b>1c</b> at 94 °C are 32.98, 19.20, 16.58, 13.14, 4.52 Å for d10, d11, d20, columnar slice and chain-correlation respectively as reported previously. <sup>16e</sup> ..... | 10 |

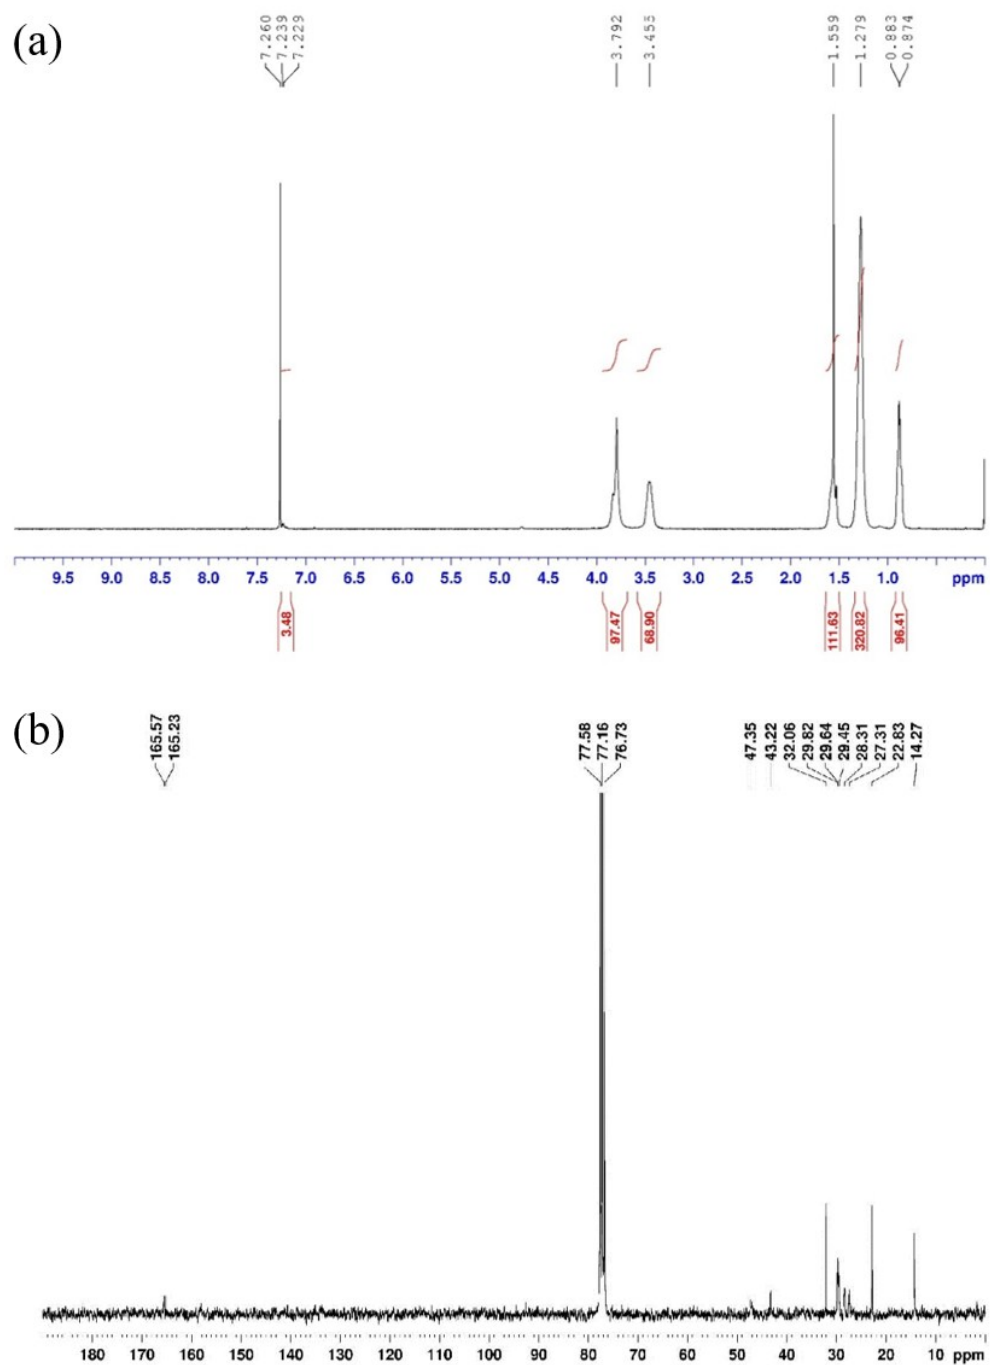

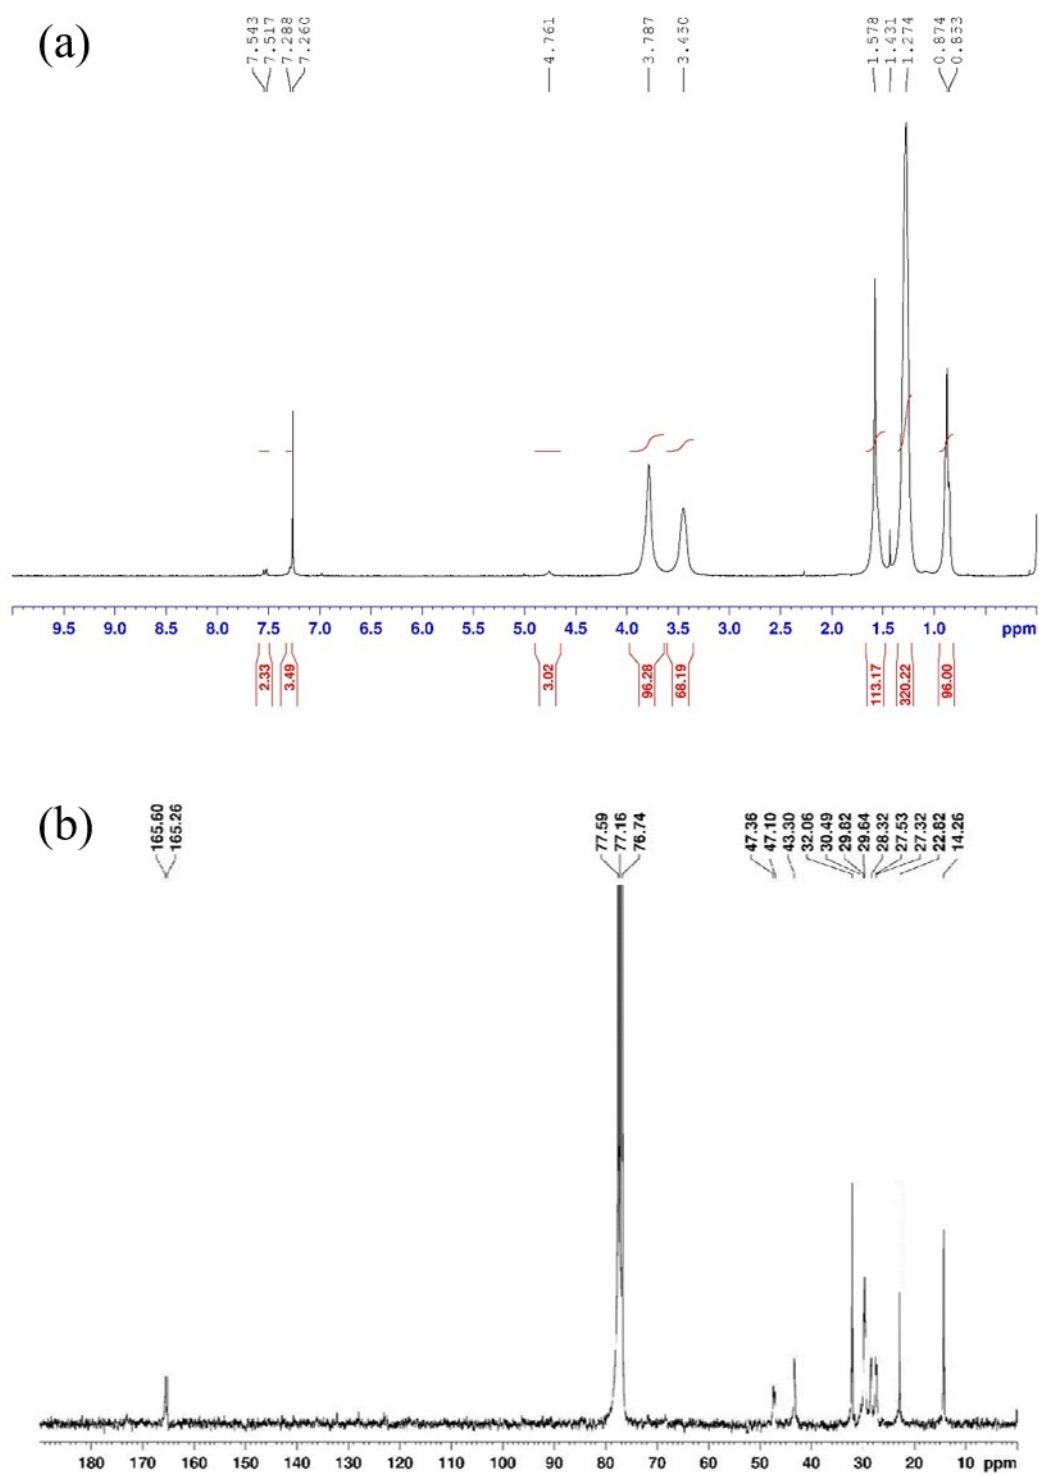

Figure S2. The (a)  $^1\text{H}$ -NMR and (b)  $^{13}\text{C}$ -NMR spectrum of **1b**.

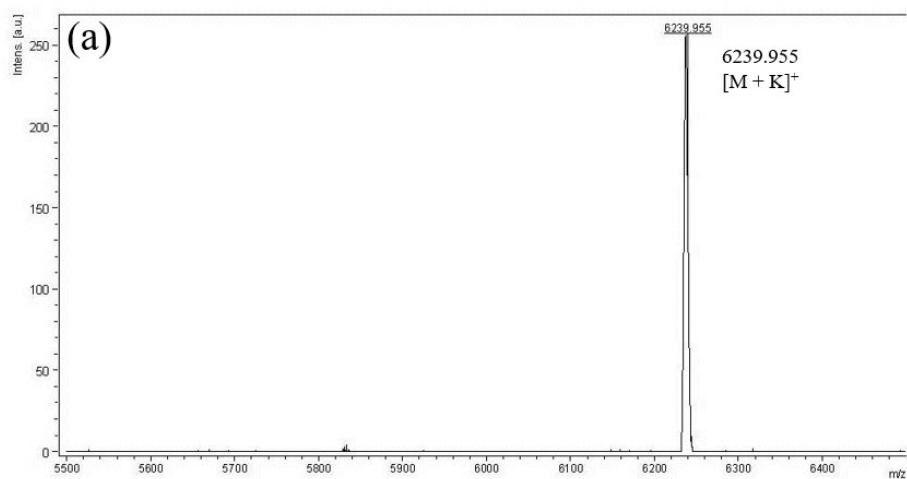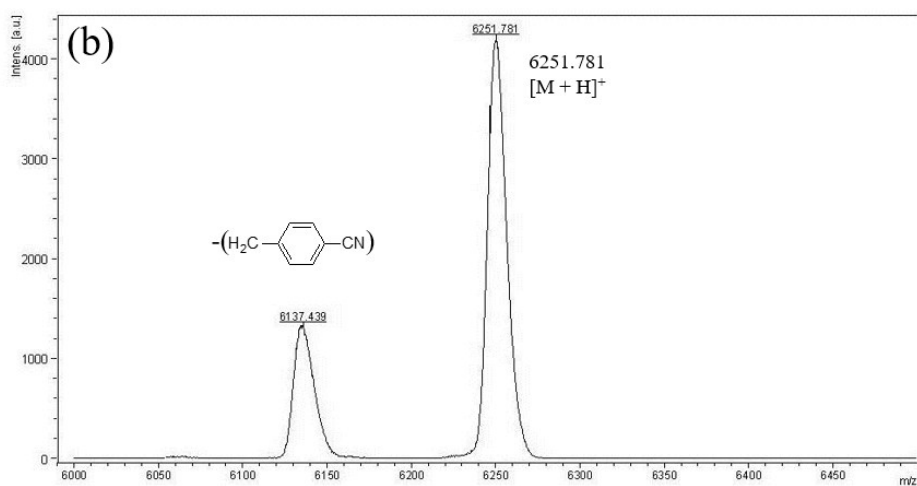

Figure S3. The MALDI-TOF mass spectrum of (a) **1a** and (b) **1b**.

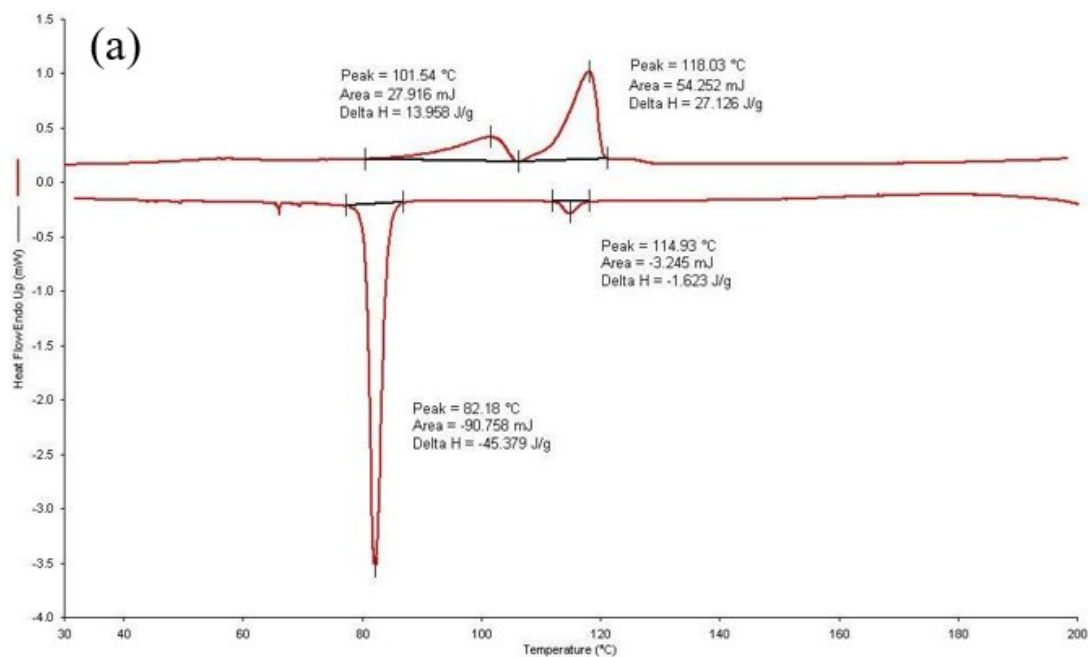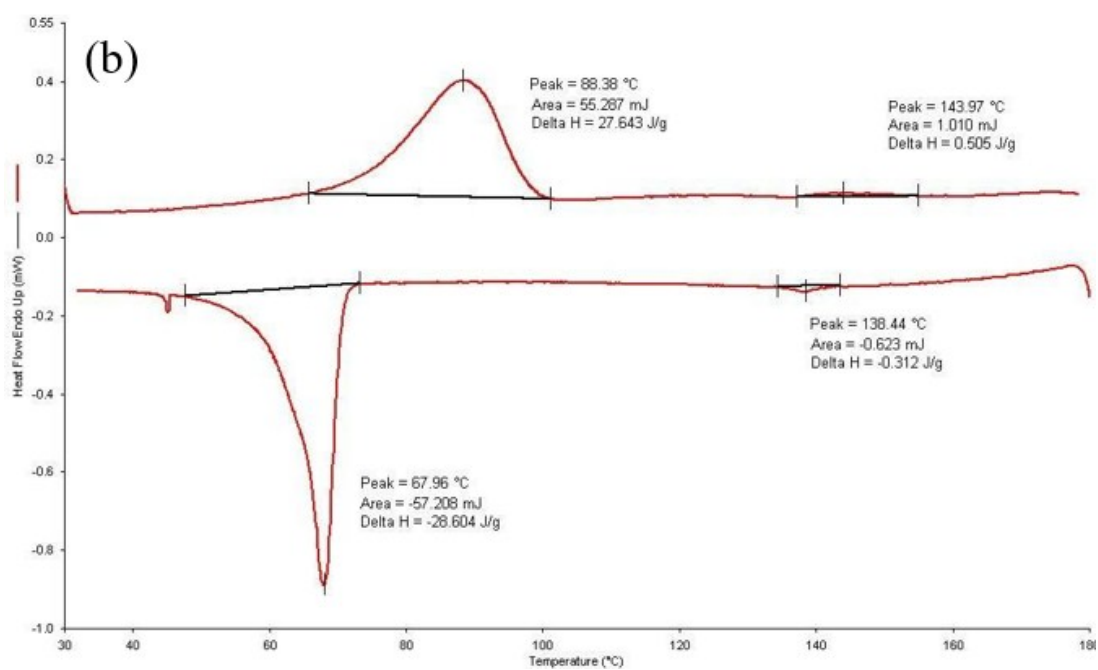

Figure S4. DSC data of compounds (a) **1a** and (b) **1b**.

Table S1. Calculated data of compounds **1a**, **1b** and **1c**.<sup>a</sup>

| Cpd       | phase<br>(T (°C))          | $M_r$ | $N_{\text{ch}}$ | $N_{\text{C}}$ | $T$ (°C) | $V_{\text{CH}_2}$ (Å <sup>3</sup> ) | $\Delta V_{\text{CH}_3}$<br>(Å <sup>3</sup> ) | $V_{\text{CH}}$ (Å <sup>3</sup> ) | $V_{\text{m}}$ (Å <sup>3</sup> ) | $d_{100}$ (Å) | $a$ (Å) | $S_{\text{col}}$ (Å <sup>2</sup> ) | $h$ (Å) | $V_{\text{cell}}$ (Å <sup>3</sup> ) | $N_{\text{cell}} =$<br>$V_{\text{cell}}/V_{\text{m}}$ | $V_{\text{m}}/V_{\text{cell}}$ |
|-----------|----------------------------|-------|-----------------|----------------|----------|-------------------------------------|-----------------------------------------------|-----------------------------------|----------------------------------|---------------|---------|------------------------------------|---------|-------------------------------------|-------------------------------------------------------|--------------------------------|
| <b>1a</b> | Col <sub>h</sub><br>(110)  | 6202  | 32              | 8              | 110      | 28.8                                | 34.1                                          | 8462.9                            | 10981.1                          | 36.29         | 41.9    | 1520.7                             | 9       | 13686.3                             | 1.25                                                  | 0.80                           |
| <b>1b</b> | Col <sub>h</sub><br>(130)  | 6252  | 32              | 8              | 130      | 29.2                                | 36.4                                          | 8642.2                            | 11225.9                          | 32.85         | 38.4    | 1278.9                             | 9       | 11510.1                             | 1.03                                                  | 0.98                           |
| <b>1c</b> | Col <sub>h</sub><br>(C114) | 6022  | 16              | 6              | 115      | 28.9                                | 34.6                                          | 3328.6                            | 10700.0                          | 32.86         | 37.9    | 1246.8                             | 9       | 11221.4                             | 1.05                                                  | 0.95                           |
| <b>1c</b> | Col <sub>h</sub><br>(C110) | 6022  | 16              | 6              | 110      | 28.8                                | 34.1                                          | 3309.9                            | 10662.4                          | 32.87         | 38.0    | 1247.8                             | 9       | 11230.3                             | 1.05                                                  | 0.95                           |
| <b>1c</b> | Col <sub>h</sub><br>(C105) | 6022  | 16              | 6              | 105      | 28.7                                | 33.5                                          | 3291.6                            | 10624.8                          | 32.88         | 38.0    | 1248.3                             | 9       | 11235.1                             | 1.06                                                  | 0.95                           |
| <b>1c</b> | Col <sub>h</sub><br>(94)   | 6022  | 16              | 6              | 94       | 28.5                                | 32.4                                          | 3252.5                            | 10542.0                          | 32.98         | 38.1    | 1255.9                             | 9       | 11303.5                             | 1.07                                                  | 0.93                           |

<sup>a</sup> $M_r$  is the molecular weight.  $V_{\text{m}}$  and  $V_{\text{cell}}$  are the molecular and cell volumes respectively.  $S_{\text{col}}$  is the area of one columnar stratum. The equations and calculations corresponding to these values are detailed in the supporting information.

**Synthesis of 2** (*N,N*-di(4-cyanobenzal)amino-propane):

1,3-Propanediamine (0.74 g, 10.0 mmol) and 4-cyanobenzaldehyde (2.62 g, 20.0 mmol) were added to dry EtOH (40 ml). The reaction was stirred at room temperature for 24 h. NaBH<sub>4</sub> (3.78 g, 100.0 mmol) was then added and the resulting solution was stirred at room temperature for 3 h. Ethanol was removed to give a sticky residue. 0.5M K<sub>2</sub>CO<sub>3</sub> aqueous solution (30 ml) was added and then extracted with CH<sub>2</sub>Cl<sub>2</sub> (30 mL) and. The organic extract was washed by water (20 mL), and then dried over MgSO<sub>4</sub>. It was evaporated at reduced pressure, and the residue was purified by column (SiO<sub>2</sub>: 2.1 cm × 20 cm; eluent: CH<sub>2</sub>Cl<sub>2</sub>:THF = 5:1) to give compound **2** in 93.2% (2.85g) yield as an oily solid. <sup>1</sup>H NMR (300MHz, CDCl<sub>3</sub>, 25°C, TMS): 1.25 (s, 2H, 2×NH), 1.71–1.77 (m, 2H, 1×CH<sub>3</sub>), 2.70 (t, J = 6.6 Hz, 4H, 2×CH<sub>2</sub>), 3.84 (s, 4H, 2×CH<sub>2</sub>), 7.19 (d, J = 8.1 Hz, 4H, 4×CH), 7.60 (d, J = 8.1 Hz, 4H, 4×Ar-H) ppm. <sup>13</sup>C NMR (75MHz, CDCl<sub>3</sub>, 25 °C, TMS): δ29.47, 29.66, 29.92, 30.34, 48.12, 53.73, 110.93, 119.06, 128.72, 132.36, 146.23. HR-MS caclcd for C<sub>19</sub>H<sub>21</sub>N<sub>4</sub> (M+H)<sup>+</sup>: 305.1766; found 305.1765(80%) + 306.1802(20%).

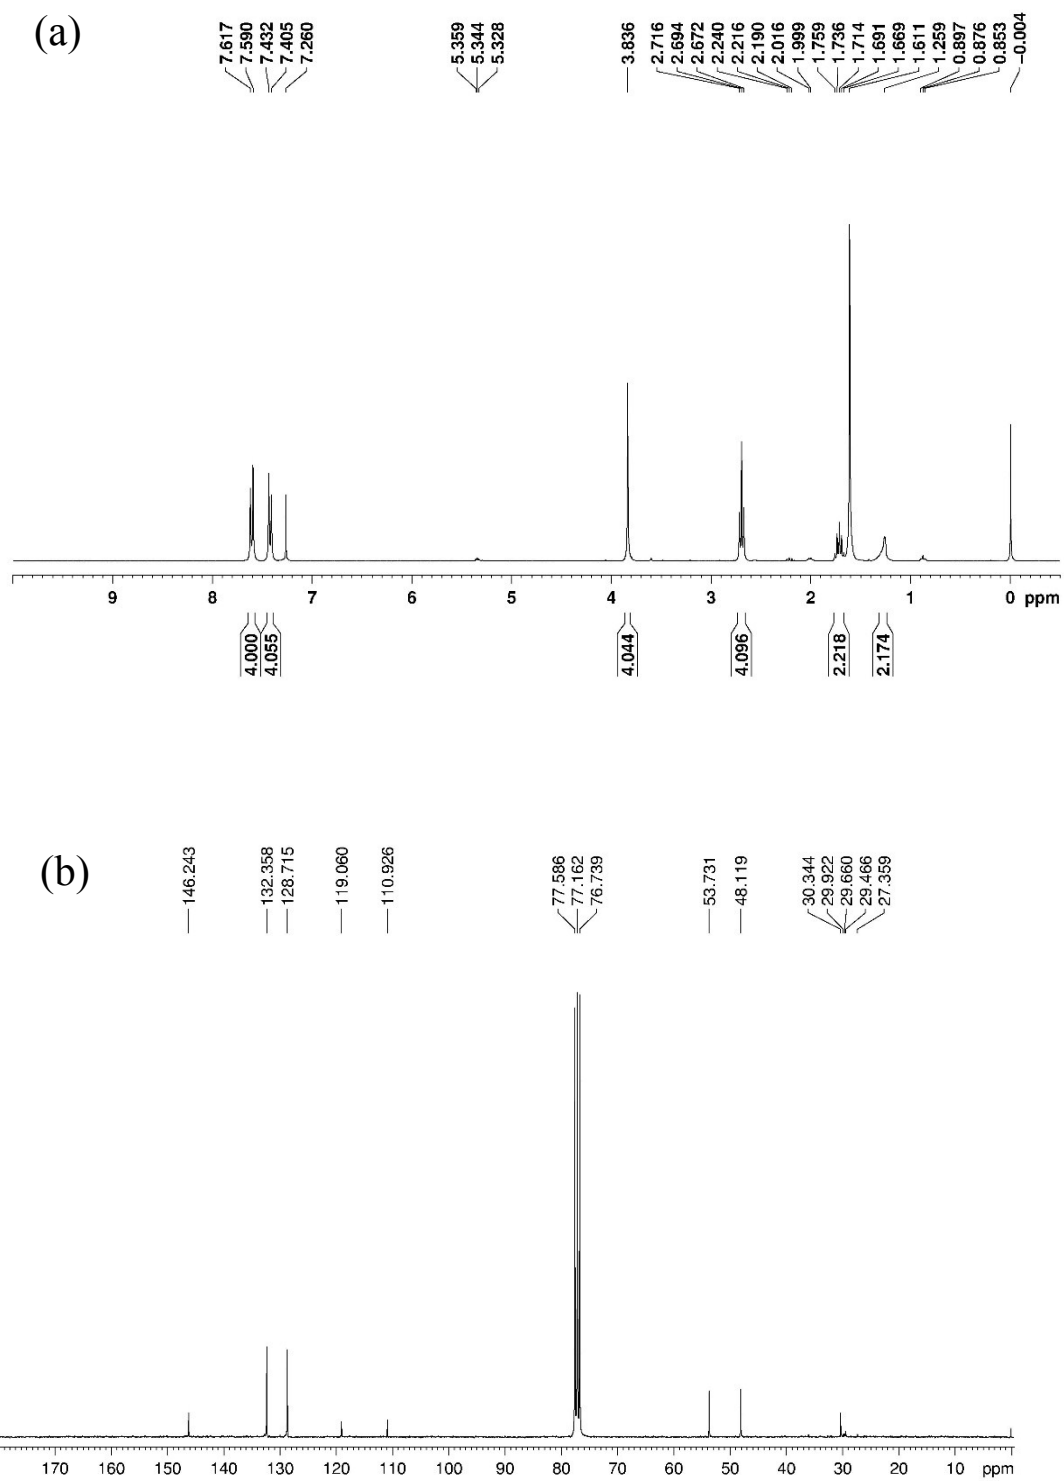



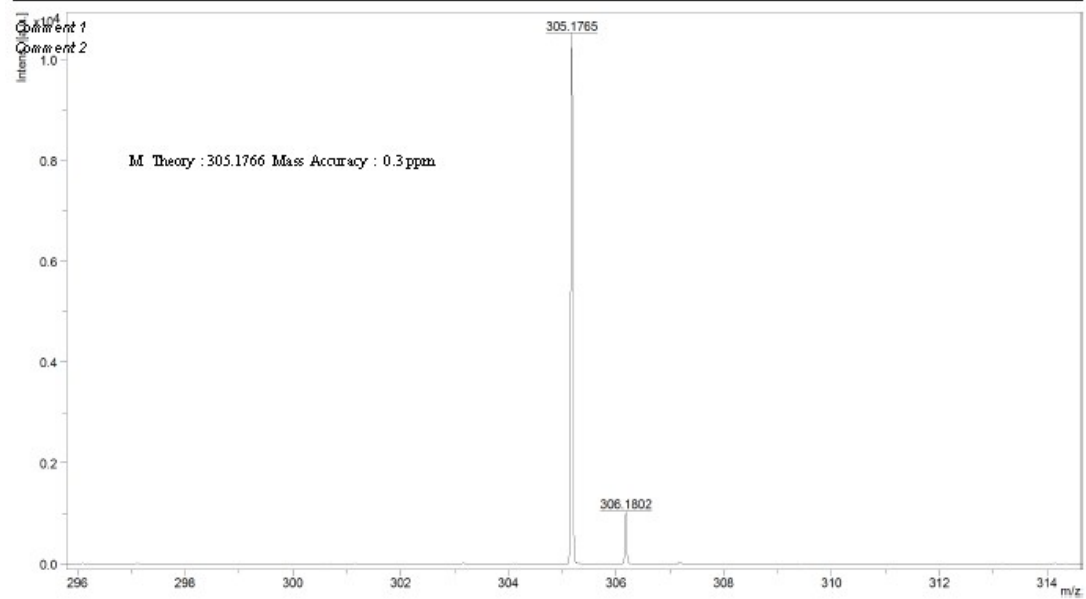

Figure S7. The HR mass spectrum of **2**.

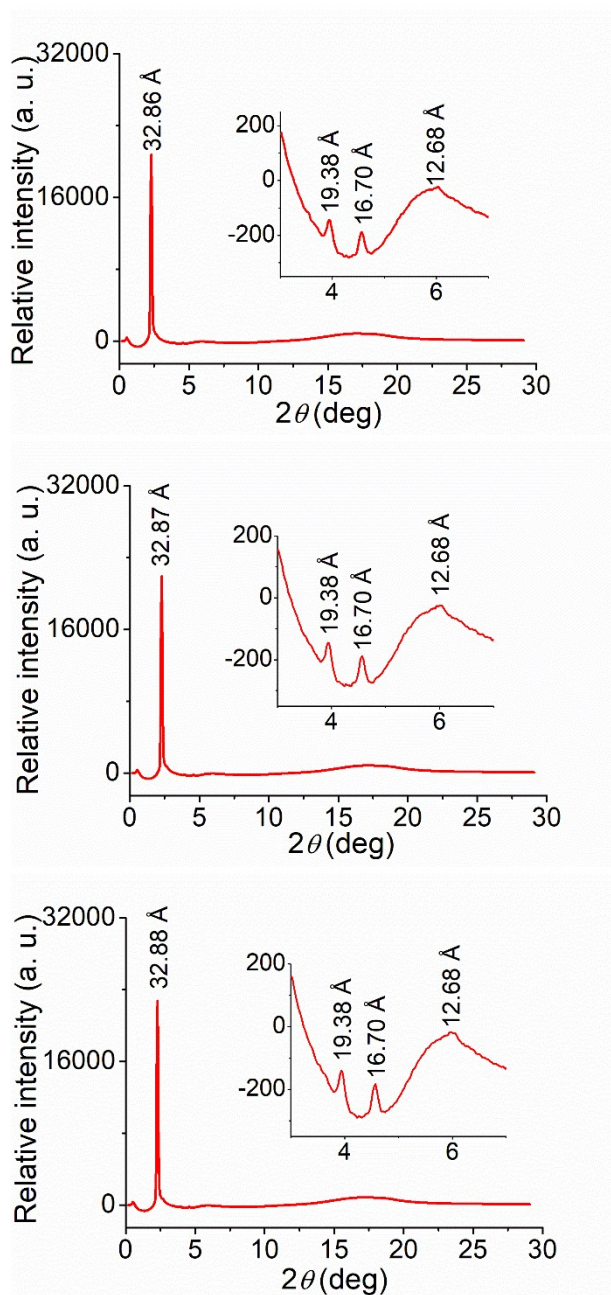

Figure S8. The powder-XRD patterns of **1c** upon cooling at 114 (top), 110 (middle), and 105 °C (bottom). For comparison, the d-spacings of **1c** at 94 °C are 32.98, 19.20, 16.58, 13.14, 4.52 Å for d<sub>10</sub>, d<sub>11</sub>, d<sub>20</sub>, columnar slice and chain-correlation respectively as reported previously.<sup>16e</sup>
